# Supplementary material
Source: publisher figshare collection journal article supplement (https://karger.figshare.com/ndownloader/files/35099716)
Supplement: Supplementary file 1 [file 35099716]

## Sheet: Suppl. Table 2
Supplementary Table S2. Observation items and crude drugs
		% Change							Responsiveness
Patient No.	Kampo formula	zonulin	DAO	IgE	LDH	Eosino	IL31	TARC	POEM	EASI	5D	Skindex-16	VAS	Forsythia Fruit	Citrus unshiu Peel	Immature Orange	Cnidium Rhizome	Peony Root	Glycyrrhiza Root	Angerica Root	Ginger	Rehmannia Root	Scutellaria Root	Gardenia Fruit	Coptis Rhizome	Saposhnikovia Root	Phellodendron Bark	Schizonepeta Spike	Cinnamon Bark	Astragalus Root	Platycodon Root	Jujube	Poria Sclerotium	Atractylodes lancea Rhizome	Bupleurum Root	Mentha Herb Japanese Mint	Koi	Aralia Rhizome	Quercus Bark	Coix Seed	Rhubarb	Evodia Fruit	Alisma Rhizome	Polygonum Root	Tribulus Fruit	Burdock Fruit	Trichosanthes Seed	Lonicera Leaf and Stem	Safflower
K012	Bofutsushosan	−66.1	44.3	51.2	15.3	55	4.1	129.3	48.2143	48.6806	55	50	50	1			1	1	1	1	1		1	1		1		1			1			1		1					1
K005	Sokeikakketsuto	−59.6	35	−13.3	−3.7	34.4	71.5	36.3	46.4286	49.5139	40	56.25	35.5		1		1	1	1	1	1	1				1							1	1
K006	Saikoseikanto	−29.5	34.3	0	−29.3	502.9	−32.7	−39.8	42.8571	34.3056	45	46.875	53.5	1			1	1	1	1		1	1	1	1		1				1				1
K027	Jizuso’ippo	−19.6	−20.2	7.7	10.5	63.4	3.4	−4.6	51.7857	48.9583	37.5	40.625	9.5	1			1		1							1		1						1							1							1	1
K011	Jizuso’ippo	−13	−18.8	22.2	4.8	−35.5	12.6	−4.1	33.9286	43.125	35	42.1875	39	1			1		1							1		1						1							1							1	1
K004	Keishikaogito	−11.8	43.1	−20.7	−10.7	−51.1	−17.6	−38.7	37.5	49.9306	42.5	38.0208	55.5					1	1		1								1	1		1
K016	Jumihaidokuto・Unsei’in	−9.8	2.8	17.9	−5.8	−50.9	66.1	−33	35.7143	49.1667	37.5	23.4375	32.5	1			1	1	1	1	1	1	1	1	1	1	1	1			1		1		1			1	1
K013	Toki’inshi	−9.2	18.5	−26.1	16.3	−11.8	0.4	−1.6	25	48.1944	35	29.6875	15				1	1	1	1		1				1		1		1						1								1	1	1	1
K021	Jumihaidokuto	−5.9	13.5	14.3	15.7	82.1	5.5	−4.4	46.4286	48.1944	42.5	44.2708	27.5	1			1		1		1					1		1			1		1		1			1	1	1
K022	Unkeito	−4.9	20.1	7	7.6	13.5	−13	−12.4	30.3571	49.0278	35	34.375	37.5				1	1	1	1	1								1													1
K023	Unsei’in	−1.9	−19.5	−8	−7.7	21.6	−34.6	8.1	35.7143	49.4444	35	30.2083	27.5				1	1		1		1	1	1	1		1
K017	Unsei’in	−0.8	67.8	−43.3	−6.1	−34.9	28.1	−2.2	37.5	42.4306	37.5	40.625	27.5				1	1		1		1	1	1	1		1
K026	Seijobofuto	1.5	−16.5	−15.6	1.9	−52.4	−26.8	−3	37.5	49.375	45	39.5833	32.5	1		1	1		1				1	1	1	1		1			1					1
K001	Unsei’in	3	−31.5	5.9	10.2	86.5	−42.9	111.9	42.8571	47.9861	37.5	41.1458	46				1	1		1		1	1	1	1		1
K024	Sanmotsu‘ogonto	3.2	−7.1	11.1	11.2	−39.8	9.3	15.2	50	48.75	52.5	52.0833	57.5									1	1
K009	Unsei’in	3.9	−35.4	18.5	−5.4	26.8	−21.1	11	32.1429	48.75	27.5	11.9792	30				1	1		1		1	1	1	1		1
K015	Saikoseikanto	9.4	−9.2	38.5	−25.5	99.5	9.7	−58.3	50	31.1806	42.5	53.6458	36	1			1	1	1	1		1	1	1	1		1				1				1
K010	Ogikenchuto	10.9	−34.3	−5.9	−14.8	−53.3	−34.7	−5.8	35.7143	48.9583	30	34.8958	38.5					1	1		1								1	1		1					1
K008	Unkeito	11.1	15.9	−25	−17.1	77.4	−22	25.6	41.0714	48.8194	37.5	30.7292	40.5				1	1	1	1	1								1													1
K003	Unsei’in	13.7	29.8	−21.3	17.6	401.4	−32.4	69.3	33.9286	47.7083	45	36.9792	18				1	1		1		1	1	1	1		1
K019	Ogikenchuto	13.9	19.7	−23.9	68.8	158.8	5.1	195.9	62.5	50.2083	67.5	57.8125	55					1	1		1								1	1		1					1			1
K029	Tokishakuyakusan	14.7	−34.5	−36.1	−5.2	45.7	−17.7	−45.6	39.2857	45.9722	32.5	30.7292	27.5				1	1		1													1	1						1			1
K025	Tokishigyakukagosyuyusyokyoto	16.4	17.6	20.7	3.7	−31.8	−23.5	27.7	26.7857	49.5833	30	35.4167	20					1	1	1	1								1			1										1
K014	Ogikenchuto	26.7	−12.6	0	36.7	−4.5	−9.3	−15.7	46.4286	49.4444	47.5	46.875	35					1	1		1								1	1		1					1
K018	Toki’inshi	28.9	−15.2	0	13.6	−37.6	−9.9	−7.3	26.7857	48.8194	25	13.0208	10				1	1	1	1		1				1		1		1						1								1	1	1	1
K028	Jumihaidokuto・Keishikaogito	36.3	−4.1	10	13.9	60.5	−1.5	41.7	42.8571	48.1944	40	35.4167	35.5	1			1	1	1		1					1		1	1	1	1	1	1		1			1	1
K002	Tokishakuyakusan	57.8	43.1	−6.7	−7.4	61.4	−41.6	4.4	33.9286	40.6944	37.5	31.25	35				1	1		1													1	1						1			1
K007	Unsei’in	437.1	−59.9	270.4	3.3	28.1	−6.4	9.2	46.4286	47.6389	47.5	43.2292	35				1	1		1		7	7	1	1		1
														The number in each cell indicates whether the formula in the row includes the crude drug in the column, where 1 indicates inclusion.
[truncated: 19 more columns]
